# Supplementary material
Source: PubMed Central journal article supplement (PMC4559528)
Supplement: 14_178_Jeftic_Suppl.pdf [file 14_178_Jeftic_Suppl.pdf]

## Supplemental Data

# Galectin-3 Ablation Enhances Liver Steatosis, but Attenuates Inflammation and IL-33-Dependent Fibrosis in Obesogenic Mouse Model of Nonalcoholic Steatohepatitis

Ilija Jeftic,<sup>1,2</sup> Nemanja Jovicic,<sup>1,3</sup> Jelena Pantic,<sup>1</sup> Nebojsa Arsenijevic,<sup>1</sup> Miodrag L Lukic,<sup>1</sup> and Nada Pejnovic<sup>1,2</sup>

Online address: <http://www.molmed.org>

The Feinstein Institute  
for Medical Research   
Empowering Imagination. Pioneering Discovery.®

**Supplementary Table S1.** Primers used for qRT-PCR analysis.

|           | Sense (5' to 3')           | Antisense (5' to 3')       |
|-----------|----------------------------|----------------------------|
| Procol.α1 | GCTCCTCTTAGGGGCCACT        | CCACGTCTCACCATTGGGG        |
| α-SMA     | ACTGGGACGACATGGAAAAG       | CATCTCCAGAGTCCAGCAC        |
| CD11c     | ATGGAGCCTCAAGACAGGAC       | GGATCTGGGATGCTGAAATC       |
| F4/80     | TGCATCTAGCAATGGACAGC       | GCCTTCTGGATCCATTGAA        |
| CCL2      | CAGGTCCCTGTCATGCTTCT       | GTCAGCACAGACCTCTCTCT       |
| NLRP3     | AGCCTTCCAGGATCCTCTTC       | CTTGGGCAGCAGTTTCTTTC       |
| Caspase 1 | AGATGGCACATTCCAGGAC        | GATCCTCCAGCAGCAACTTC       |
| IL-1β     | TCITTGAAGTTGACGGACCC       | TGAGTGATACTGCCTGCCTG       |
| IL-6      | TCCATCCAGTTGCCCTTCTTG      | TTCCACGATTTCCAGAGAAC       |
| TNF-α     | CCACATCTCCCTCCAGAAAA       | AGGGTCTGGGCCATAGAAT        |
| TLR4      | CGCTTTCACCTCTGCCTTCACTACAG | ACACTACCACAATAACCTTCCGGCTC |
| CD14      | AGGGTACAGCTGCAAGGACT       | CTTCAGCCCAGTAAAAGACA       |
| Nox2      | CGGTGTGCAGTGCTATCATC       | GCTCTCCTTCTCAGGGGTT        |
| P22phox   | CCTGCSGCGATAGAGTAGGC       | TCATGGGGCAGATCGAGT         |
| P47phox   | ATGACCTCAATGGCTTCACC       | CTATCTGGAGCCCCCTTGACA      |
| P67phox   | CTATCAGCTGGTTCCCACGA       | GCAGTGGCCTACTTCCAGAG       |
| IL-33     | TCCTTGCTTGGCAGTATCCA       | TGCTCAATGTGTCAACAGACG      |
| ST2       | GCAATTCTGACACTTCCCATG      | ACGATTACTGCCCTCCGTA        |
| IL-13     | CCTGGCTCTTGCTTGCCTT        | GGTCTTGTGTGATGTGCTCA       |
| TGF-β     | ATACAGGGCTTTCGATTCAGC      | GTCCAGGCTCCAAATATAGG       |
| ChREBP    | CTGGGGACCTAAAACAGGAGC      | GAAGCCACCCTATAGCTCCC       |
| LXR-α     | ATCGCCTTGCTGAAGACCTCTG     | GATGGGGTTGATGAACTCCACC     |
| LXR-β     | AAGCAGGTGCCAGGGTCT         | TGCATTCTGTCTCGTGGTTGT      |
| CREBP-1c  | GGAGCCATGGATTGCACATT       | GGCCCCGGGAAGTCACTGT        |
| PPAR-γ    | CCCAATGGTTGCTGATTACAAA     | GAGGGTGTAGAAGGTTCTTCATGA   |
| Abca-1    | CGCAGTGACCAGAAAACAATGTG    | TATCAATGAGGCAAGGGTGTGG     |
| Cd36      | TCCAGCCAATGCCITTTGC        | TGGAGATTACTTTTTTCAGTGCAGAA |
| FAS       | AGAGATCCCCGAGACGCTTCT      | GCCTGGTAGGCATTCTGTAGT      |
| CPT1      | AACCCAGTGCCTTAAACGATG      | GAACTGGTGGCCAATGAGAT       |
| DAGT1     | ACCGCGAGTTCTACAGAGATTGGT   | ACAGCTGCATTGCCATAGTCCCT    |
| DAGT2     | AGCTGGTGAAGACACAACC        | TGATGATAGCATTGCCACTCC      |
| β-actin   | AGCTGCGTTTTACACCCITT       | AAGCCATGCCAATGTTGTCT       |

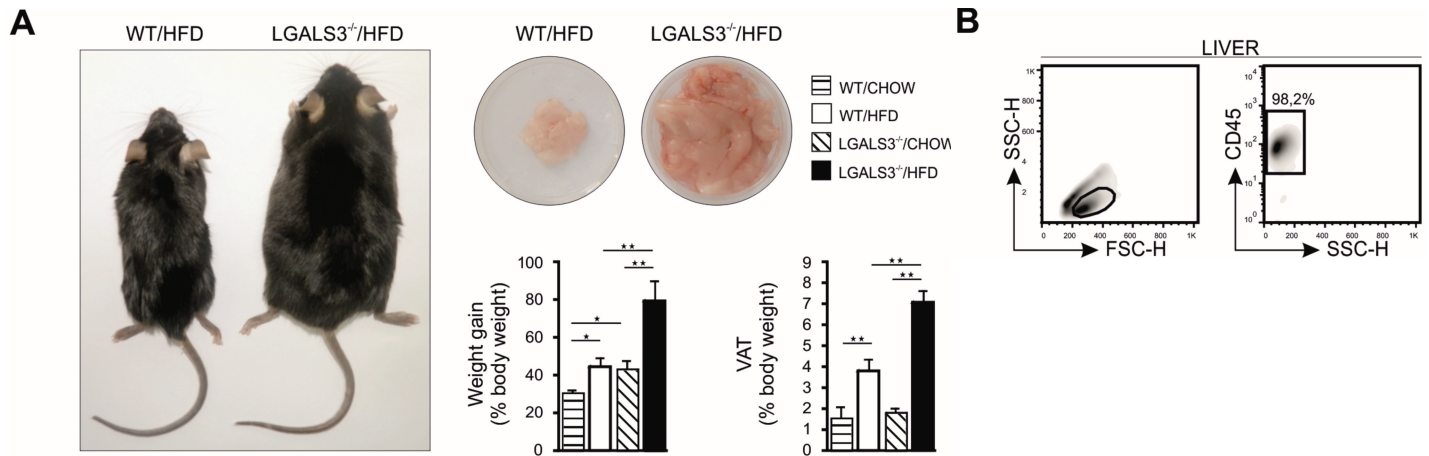

**Supplementary Figure S1.** Galectin-3 ablation accelerated HFD-induced obesity. (A) Representative images of WT and LGALS3<sup>-/-</sup> mice after 24 wks on HFD. Representative image of the larger body size of LGALS3<sup>-/-</sup> vs. WT mice. Representative image of the amount of VAT in WT and LGALS3<sup>-/-</sup> mice. Weight gain (% body weight) and VAT (% body weight). The results are shown as the means ± SEM (n=5-6 mice/group/ experiment), \*P < 0.05, \*\*P < 0.01. The results are representative of two experiments. (B) Gating region in flow cytometry analysis. Representative flow cytometric plots of gating region used to analyze liver CD45<sup>+</sup> mononuclear cells.

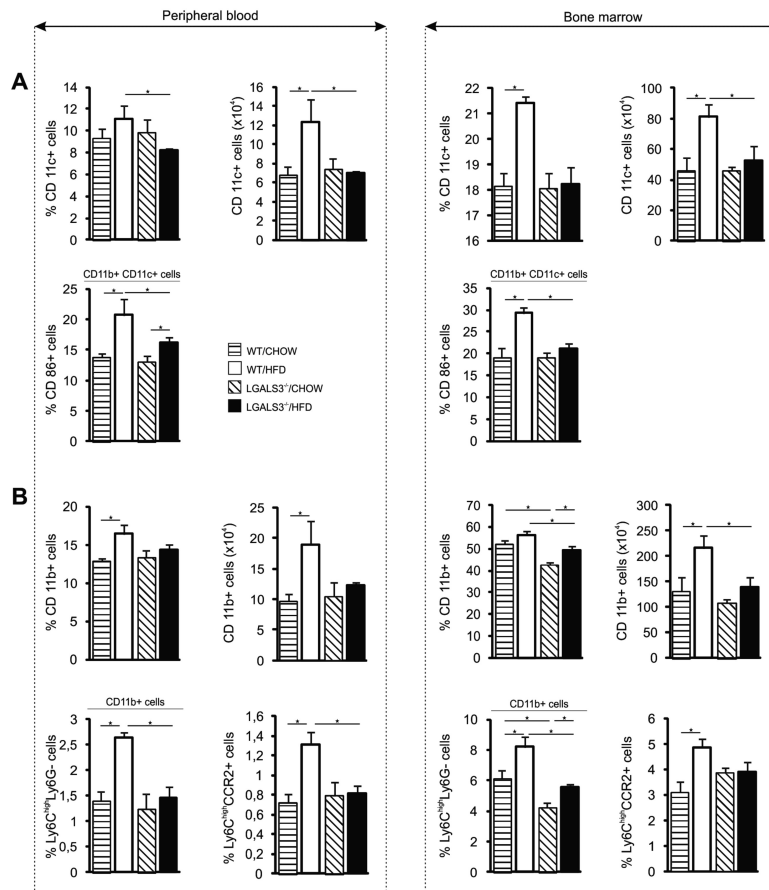

**Supplementary Figure S2.** Decreased number of mature dendritic cells and proinflammatory monocytes in peripheral blood and bone marrow in Gal-3 deficient mice on HFD. Peripheral blood and bone marrow cells were analyzed in WT and LGALS3<sup>-/-</sup> mice on HFD or standard diet for 12 wks. (A) Lower proportions and number of CD11c<sup>+</sup> DCs and mature myeloid DCs in peripheral blood and bone marrow of LGALS3<sup>-/-</sup> mice on HFD. (B) Lower proportions of proinflammatory monocytes in peripheral blood and bone marrow of LGALS3<sup>-/-</sup> mice on HFD. The results are shown as the means ± SEM (n=5-6 mice/group/experiment) \*P < 0.05, \*\*P < 0.01.

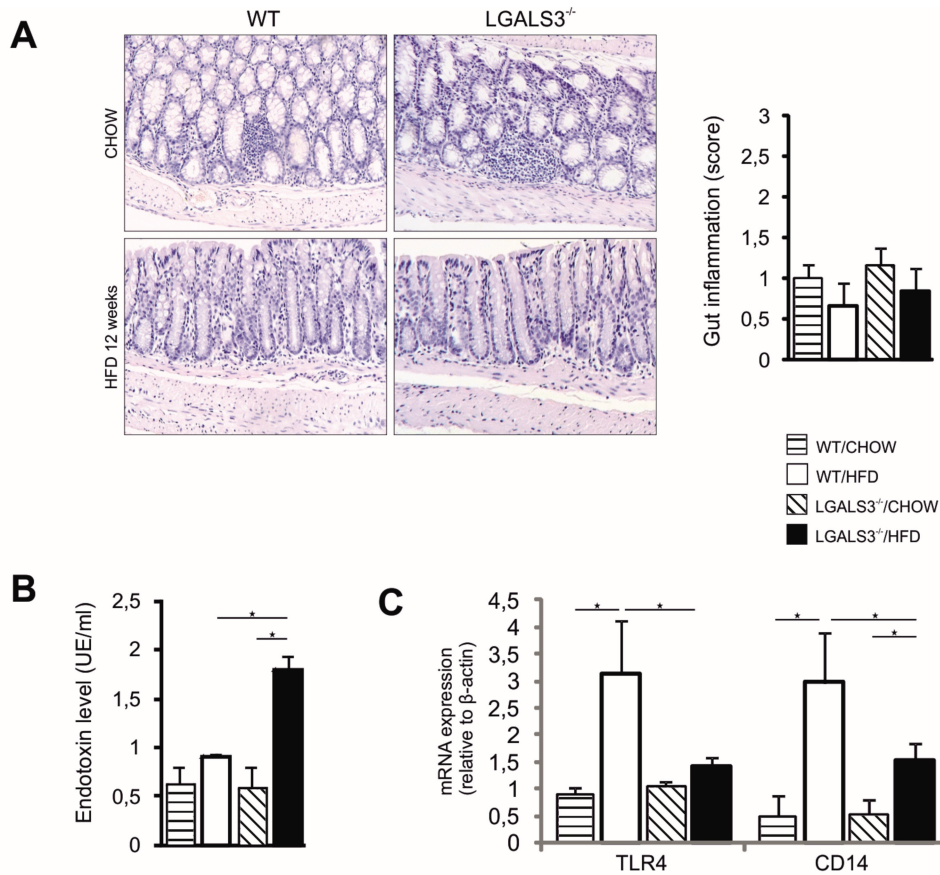

**Supplementary Figure S3.** Gut inflammation and systemic endotoxin levels. Gut inflammation and endotoxin levels were analyzed in WT and LGALS3<sup>-/-</sup> mice on HFD or standard diet for 12 wks. (A) H&E staining (x40). Grading of gut inflammation. (B) Plasma endotoxin levels (UE/ml) (C) Hepatic mRNA expression of TLR-4 and CD14 in WT and LGALS3<sup>-/-</sup> mice on HFD or standard diet for 24 wks. The results are shown as the means  $\pm$  SEM (n=5-6 mice/group/experiment) \*P < 0.05.

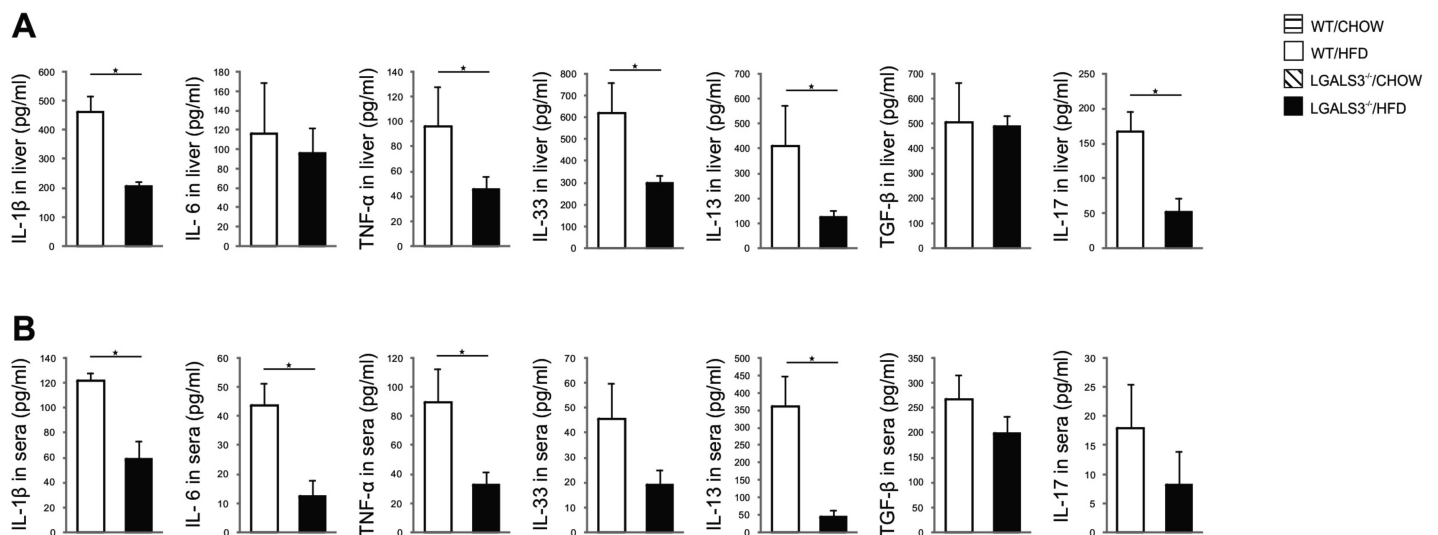

**Supplementary Figure S4.** Proinflammatory and profibrogenic cytokines. Cytokines were analyzed in WT and LGALS3<sup>-/-</sup> mice on HFD or standard diet for 24 wks. (A) Cytokine levels in the liver homogenates. (B) Cytokine levels in sera. The results are shown as the means  $\pm$  SEM (n=5-6 mice/ group/ experiment), \*P < 0.05, \*\*P < 0.01. The results are representative of two experiments.
